# Supplementary material for: Isolation, Purification, Fractionation, and Hepatoprotective Activity of Polygonatum Polysaccharides
Source: MDPI journal article supplement (doi:10.3390/molecules29051038), 2024-02-28
Supplement: s1 [file s1]

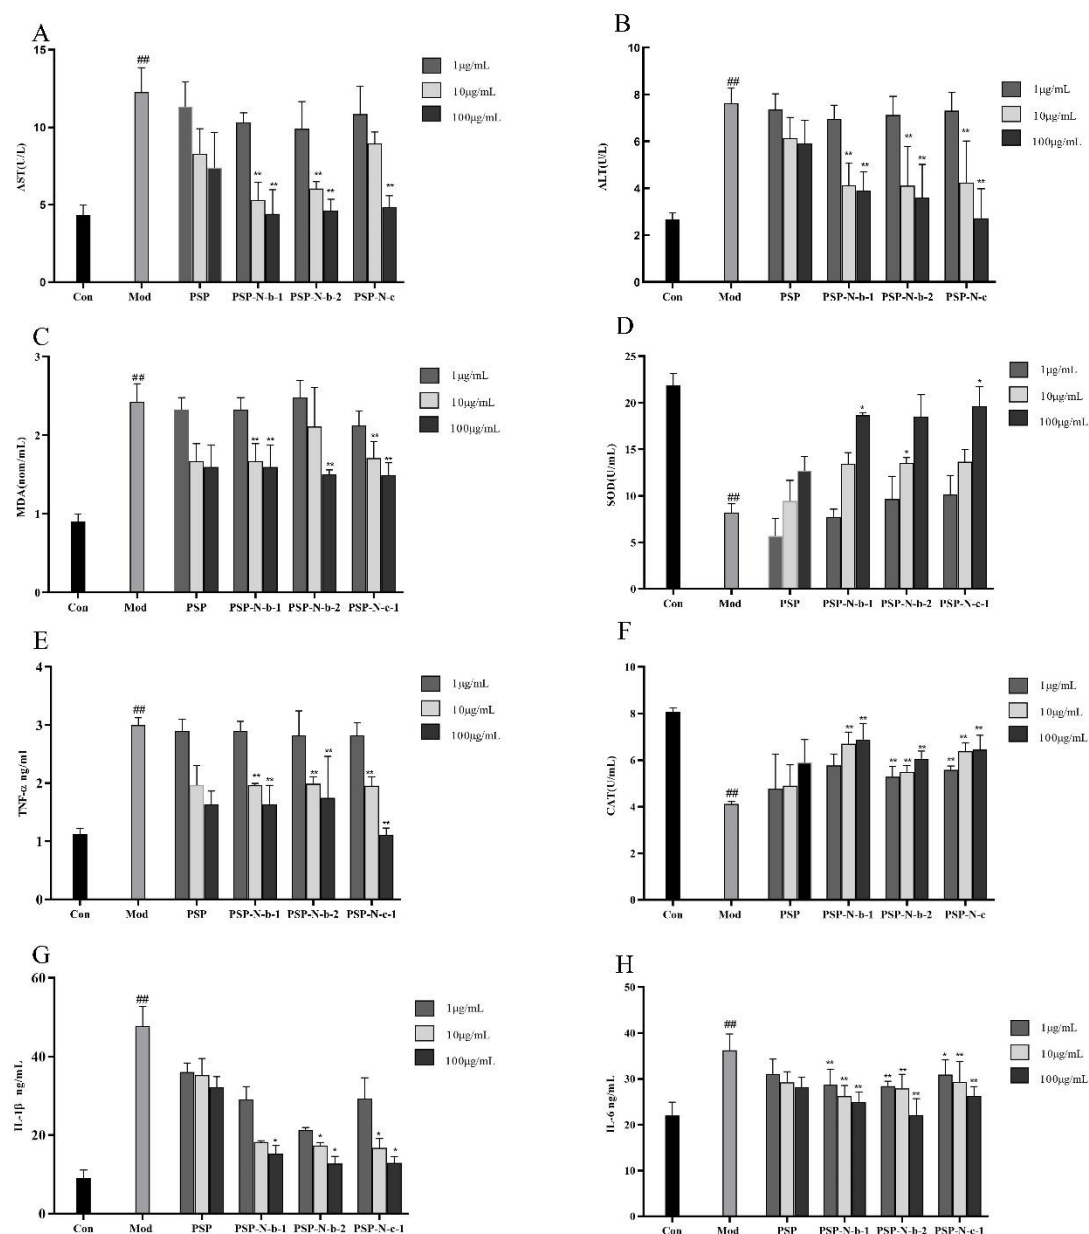

Figure S1 Effects of Polygonatum polysaccharide and its homogeneous components on HepG2 cells induced by CCl<sub>4</sub>:AST (A), ALT (B), MDA (C), SOD (D), CAT (E), TNF-α (F), IL-1β (G), and IL-6 (H). Compared with Con group, <sup>##</sup>P<0.01; compared with Mod group, \*p < 0.05, \*\*p < 0.01.
